# Supplementary material
Source: PubMed Central journal article supplement (PMC4107928)

**Figure S1. Excluding an influence of the FLAG tag on PRC2-RNA interactions.**

(A) Western blot of Flag-PRC2 complexes treated (+) or mock treated (-) with rEnterokinase to remove the FLAG tag. Top: Anti-FLAG. Bottom: Anti-EZH2. (B) EMSA shows similar pattern of RNA recognition by PRC2 containing the FLAG-tag or after FLAG-tag removal, suggesting no influence of the FLAG-tag on PRC2-RNA binding. FLAG-GFP [200nM] was used as control. (Left) RepA I-IV. (Right) MBP 1-300. Figure S1 relates to main Figure 1.

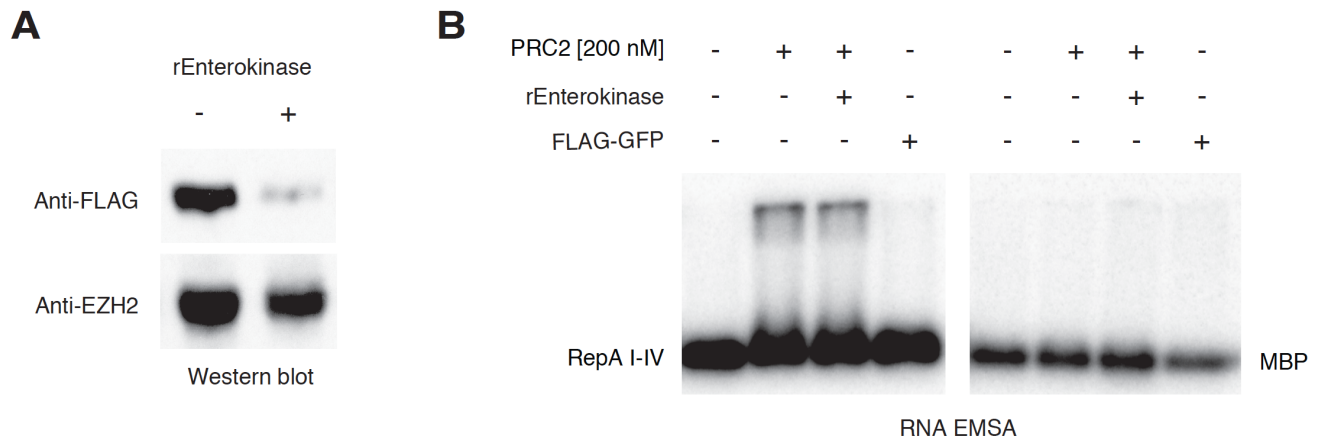

**Figure S2. RNA-binding potential of PRC2 subunits and subcomplexes to truncated RepA and HOTAIR RNAs.**

(A-D) RNA EMSA to test binding of single PRC2 subunits and PRC2 subcomplexes to truncated RNAs.

(A) EZH2. (B) SUZ12. (C) EED. (D) Subcomplexes as indicated. EZ, EZH2. EE, EED. S, SUZ12.

Probes are used at 2 nM throughout. Figure S2 relates to main Figures 1 and 3.

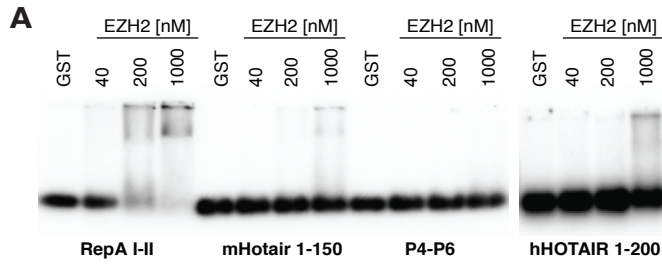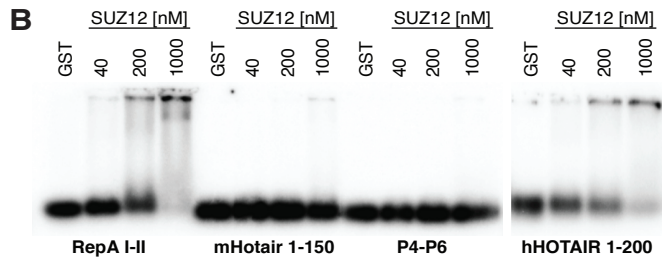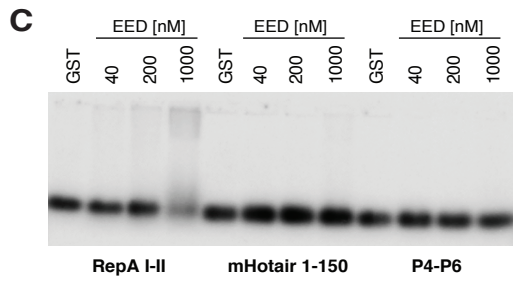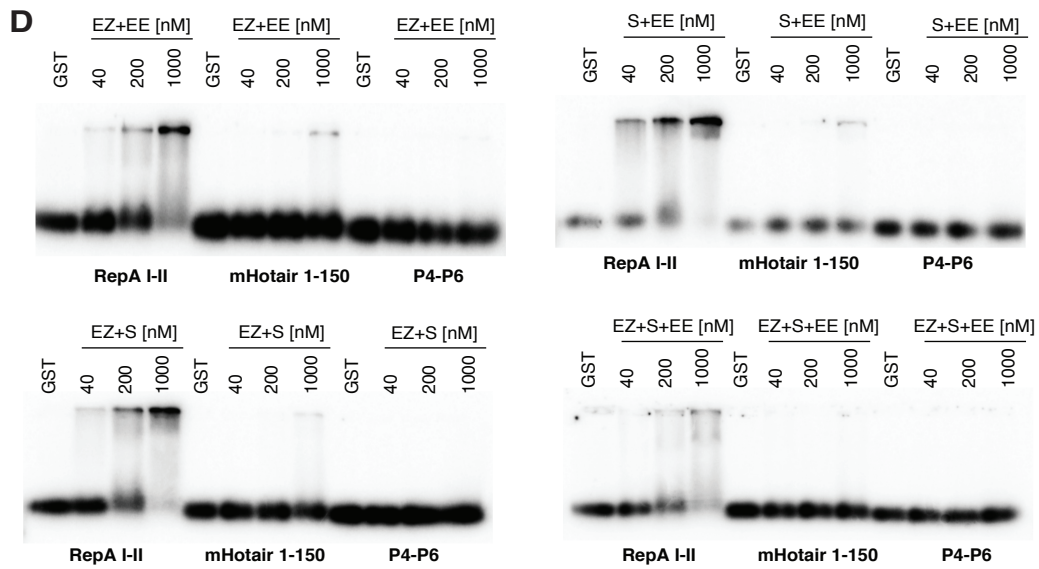

**Figure S3. Effect of JARID2 on the binding affinity of PRC2 for RNA.**

Binding isotherms of co-purified PRC2-JARID2 complexes to 2 nM of indicated RNA species. Equilibrium dissociation constants ( $K_d$ ) and  $R^2$  values shown in the table. N/A, not applicable because curves were too flat. “>1000 nM” denotes a  $K_d$  in excess of that which could be measured. Values for PRC2 + RNA and JARID2 + RNA are shown in Figures 2B and 5B. This Figure relates to main Figure 5.

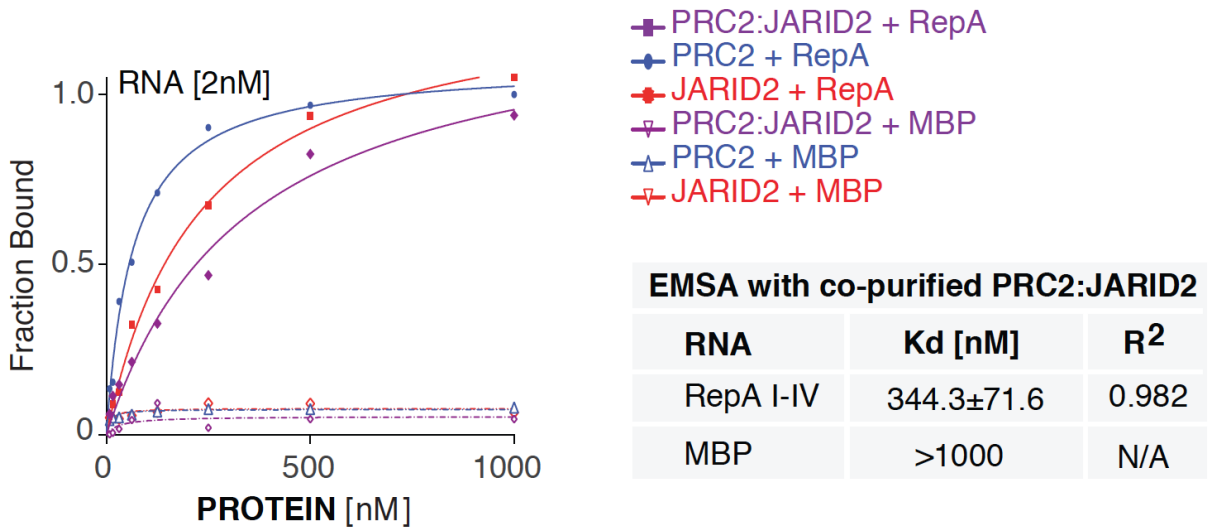

Supplement: NIHMS598175-supplement-01.pdf [file NIHMS598175-supplement-01.pdf]
